# Supplementary material for: Nitric oxide-releasing gel accelerates healing in a diabetic murine splinted excisional wound model
Source: PubMed Central journal article supplement (PMC10045479; doi:10.3389/fmed.2023.1060758), 2023-03-02

# Supplementary Figure S1

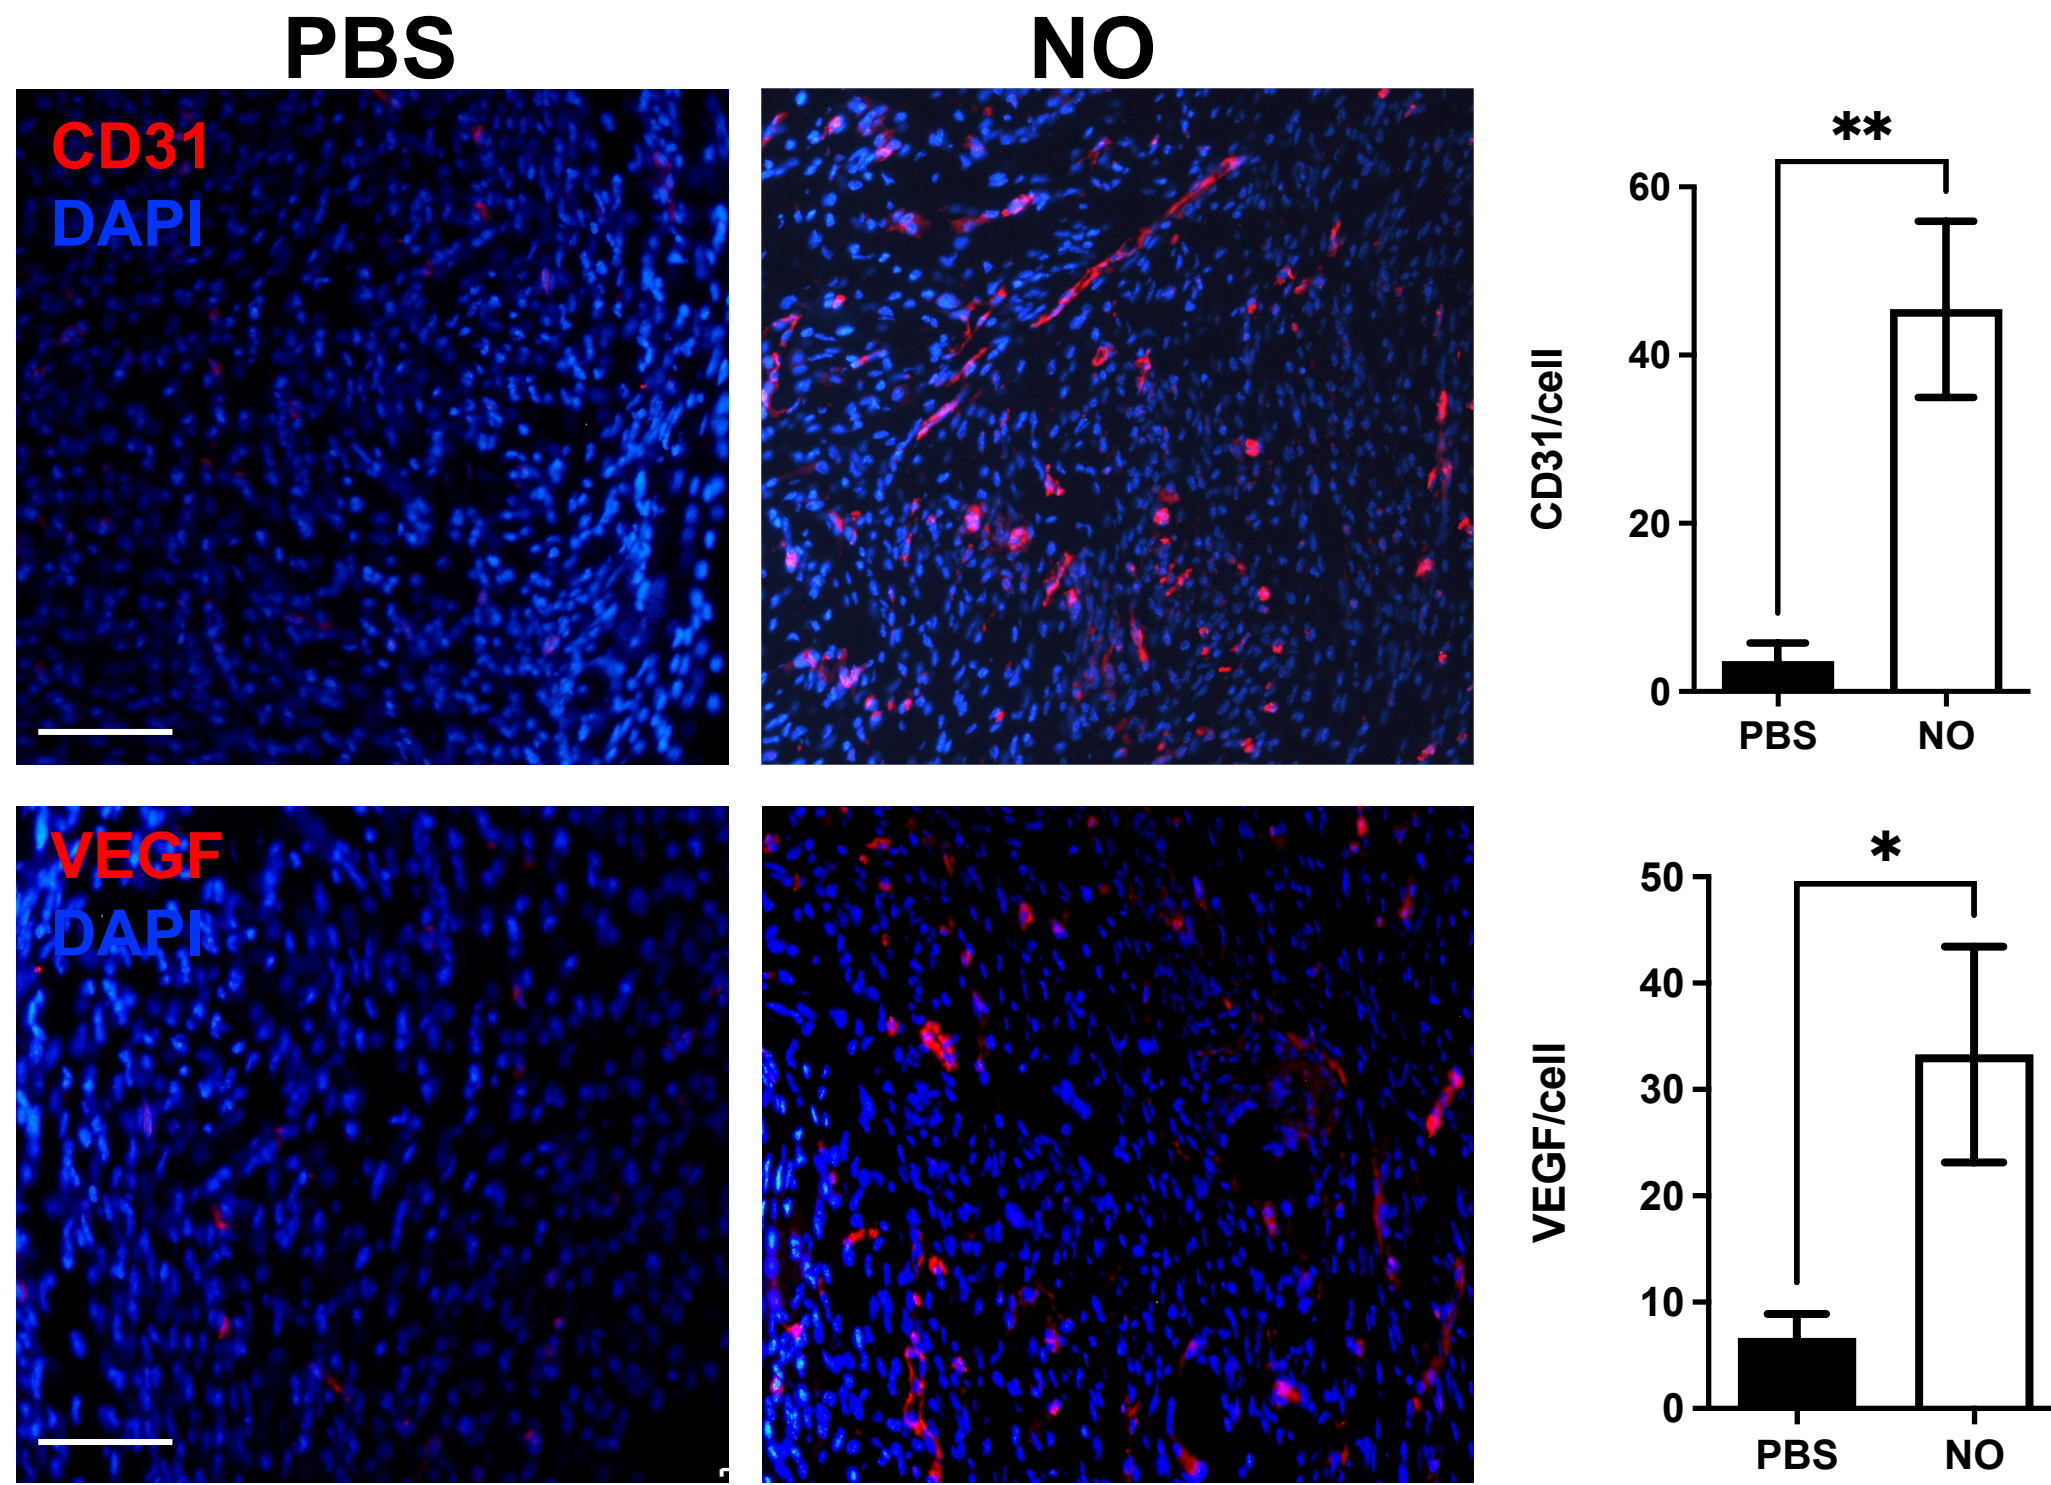

Supplement: Image_1.pdf [file Image_1.pdf]
