# Supplementary material for: Nitric oxide-releasing gel accelerates healing in a diabetic murine splinted excisional wound model
Source: PubMed Central journal article supplement (PMC10045479; doi:10.3389/fmed.2023.1060758), 2023-03-02
Supplement: Table_1.pdf [file Table_1.pdf]

# Supplementary Table 1

| <b>Mouse</b> | <b>Glucose level<br/>(day 0)</b> | <b>Mouse</b> | <b>Glucose level<br/>(day 0)</b> |
|--------------|----------------------------------|--------------|----------------------------------|
| PBS-1        | 252 (mg/dL)                      | NO-1         | 333 (mg/dL)                      |
| PBS-2        | 302 (mg/dL)                      | NO-2         | 313 (mg/dL)                      |
| PBS-3        | 289 (mg/dL)                      | NO-3         | 244 (mg/dL)                      |
| PBS-4        | 304 (mg/dL)                      | NO-4         | 287 (mg/dL)                      |
| PBS-5        | 389 (mg/dL)                      | NO-5         | 324 (mg/dL)                      |
